# Supplementary material for: A DCL3 dicing code within Pol IV-RDR2 transcripts diversifies the siRNA pool guiding RNA-directed DNA methylation
Source: eLife. 2022 Jan 31;11:e73260. doi: 10.7554/eLife.73260 (PMC8846587; doi:10.7554/eLife.73260)
Supplement: Figure 4—source data 4. — Data was obtained using Image Lab version 6.0 software. The 38 nt substrate and 24 nt diced RNA bands were boxed and % dsRNA substrate cleavage was calculated as the percentage of total signal (substrate + product) represented by the 24 nt product RNA band. Means for the triplicate reactions were calculated as well as the standard error of the mean. [file elife-73260-fig4-data4.xlsx]

## Sheet: 5' Nucleotide Preference
	Quantitative data for 5' Nucleotide Preference Experiment of Figure 4A
			% dsRNA substrate cleavage
	5' nucleotide	time (min)	source data 1	source data 2	source data 3	mean	standard deviation	standard error of the mean
	A	1	12.7	10.6	14.7	12.6667	2.0502	1.18369
		5	34.6	33	36.2	34.6	1.6	0.92376
		10	51.7	50.3	61.2	54.4	5.93043	3.42394
	U	1	20.8	15.7	21.6	19.3667	3.20052	1.84782
		5	54.5	43.3	53	50.2667	6.07975	3.51014
		10	75.6	63.6	71.7	70.3	6.12127	3.53412
	C	1	3.1	3.6	5.1	3.93333	1.04083	0.600925
		5	11.2	9.4	12.8	11.1333	1.70098	0.982061
		10	18.2	14.6	21.5	18.1	3.45109	1.99249
	G	1	1.6	0.8	1.7	1.36667	0.493288	0.2848
		5	4.3	3.5	4.3	4.03333	0.46188	0.266667
		10	7.5	5	9.5	7.33333	2.25462	1.30171
