# Supplementary material for: A DCL3 dicing code within Pol IV-RDR2 transcripts diversifies the siRNA pool guiding RNA-directed DNA methylation
Source: eLife. 2022 Jan 31;11:e73260. doi: 10.7554/eLife.73260 (PMC8846587; doi:10.7554/eLife.73260)
Supplement: Figure 4—source data 8. — Data was obtained using Image Lab version 6.0 software. The 38 nt substrate and 24 nt diced RNA bands were boxed and % dsRNA substrate cleavage was calculated as the percentage of total signal (substrate + product) represented by the 24 nt product RNA band. Means for the triplicate reactions were calculated as well as the standard error of the mean. [file elife-73260-fig4-data8.xlsx]

## Sheet: Sheet1
	Figure 4B. 3' Nucleotide Preference
			% dsRNA substrate cleavage
	5' nucleotide	time (min)	source data 1	source data 2	source data 3	mean	standard deviation	standard error of the mean
	A	1	27.8	25.3	33.5	28.8667	4.20278	2.42647
		5	55.3	58.5	63.8	59.2	4.29302	2.47857
		10	68.1	72	76.8	72.3	4.35775	2.51595
	U	1	31.7	26.7	37.6	32	5.45619	3.15013
		5	62.3	66.5	67.5	65.4333	2.75923	1.59304
		10	76.5	80.4	82.7	79.8667	3.13422	1.80954
	C	1	31.4	29.4	35.3	32.0333	3.00056	1.73237
		5	56.7	58.8	64.2	59.9	3.86911	2.23383
		10	67.6	69.1	72.8	69.8333	2.67644	1.54524
	G	1	26.6	27.9	31	28.5	2.26053	1.30512
		5	52.2	61.1	55.9	56.4	4.47102	2.58134
		10	69.8	74.8	74	72.8667	2.68576	1.55063
