# Supplementary material for: A DCL3 dicing code within Pol IV-RDR2 transcripts diversifies the siRNA pool guiding RNA-directed DNA methylation
Source: eLife journal article supplement (doi:10.7554/elife.73260), 2022-01-31

**A. Purified recombinant DCL3 used in the study**

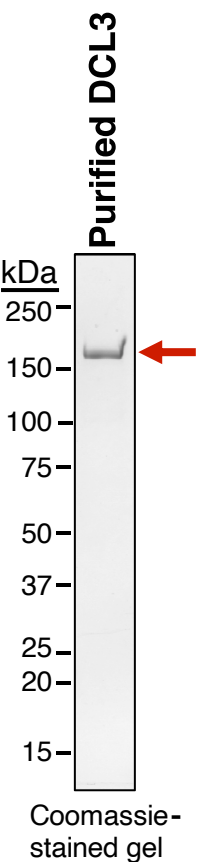

**B. DCL3 dicing time-course for dsRNAs with 3' overhangs of either 1 or 2 nt**

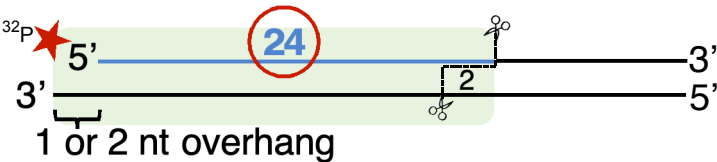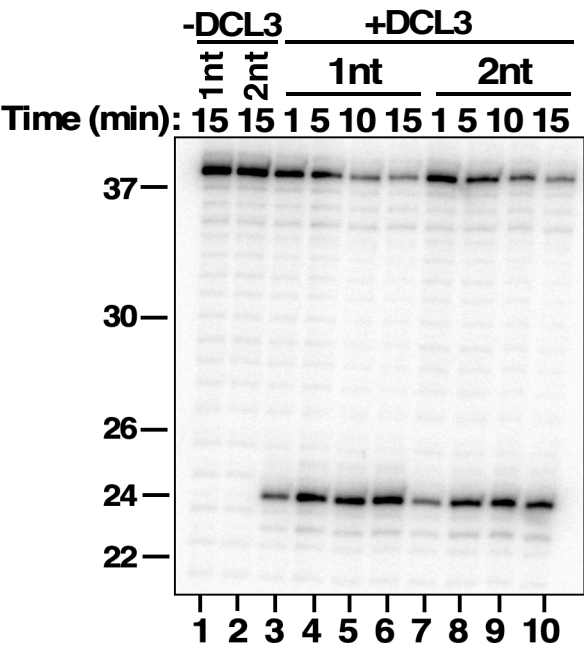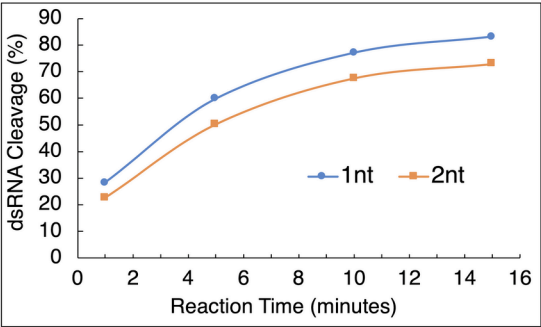

Supplement: supp [file elife-73260-supp-v1.zip]
