# Supplementary material for: A DCL3 dicing code within Pol IV-RDR2 transcripts diversifies the siRNA pool guiding RNA-directed DNA methylation
Source: eLife journal article supplement (doi:10.7554/elife.73260), 2022-01-31
Supplement: supp [file elife-73260-supp-v1.zip]

Archive with 16 entries (16 files):
- elife_poa_e73260_Figure_1_figure_supplement_1.pdf
- elife_poa_e73260_Figure_3_figure_supplement_1.pdf
- elife_poa_e73260_Figure_5_figure_supplement_1.pdf
- elife_poa_e73260_Figure_5_figure_supplement_2.pdf
- elife_poa_e73260_Supplementary_file_1.docx
- elife_poa_e73260_Transparent_Reporting_File.docx
- elife_poa_e73260_Figure_1_source_data_1.zip
- elife_poa_e73260_Figure_1_figure_supplement_1_source_data_1.zip
- elife_poa_e73260_Figure_2_source_data_1.zip
- elife_poa_e73260_Figure_3_source_data_1.pdf
- elife_poa_e73260_Figure_3_figure_supplement_1_source_data_1.pdf
- elife_poa_e73260_Figure_5_source_data_1.zip
- elife_poa_e73260_Figure_4_source_data_1.zip
- elife_poa_e73260_Figure_5_figure_supplement_1_source_data_1.pdf
- elife_poa_e73260_Figure_6_source_data_1.zip
- elife_poa_e73260_Figure_5_figure_supplement_2_source_data_1.zip
