# Supplementary material for: A DCL3 dicing code within Pol IV-RDR2 transcripts diversifies the siRNA pool guiding RNA-directed DNA methylation
Source: eLife journal article supplement (doi:10.7554/elife.73260), 2022-01-31
Supplement: supp [file elife-73260-supp-v1.zip › elife_poa_e73260_Figure_5_figure_supplement_1.pdf]

| dsRNA substrate: | Blunt-ended |   |   |   | 1 nt 3' overhang |   |   |   | 2 nt 3' overhang |   |   |   |
|------------------|-------------|---|---|---|------------------|---|---|---|------------------|---|---|---|
| DCL3:            | -           | + | + | + | -                | + | + | + | -                | + | + | + |
| 5 mM ATP:        | +           | - | + | - | +                | - | + | - | +                | - | + | - |
| 5 mM ATP-γ-S:    | -           | - | - | + | -                | - | - | + | -                | - | - | + |

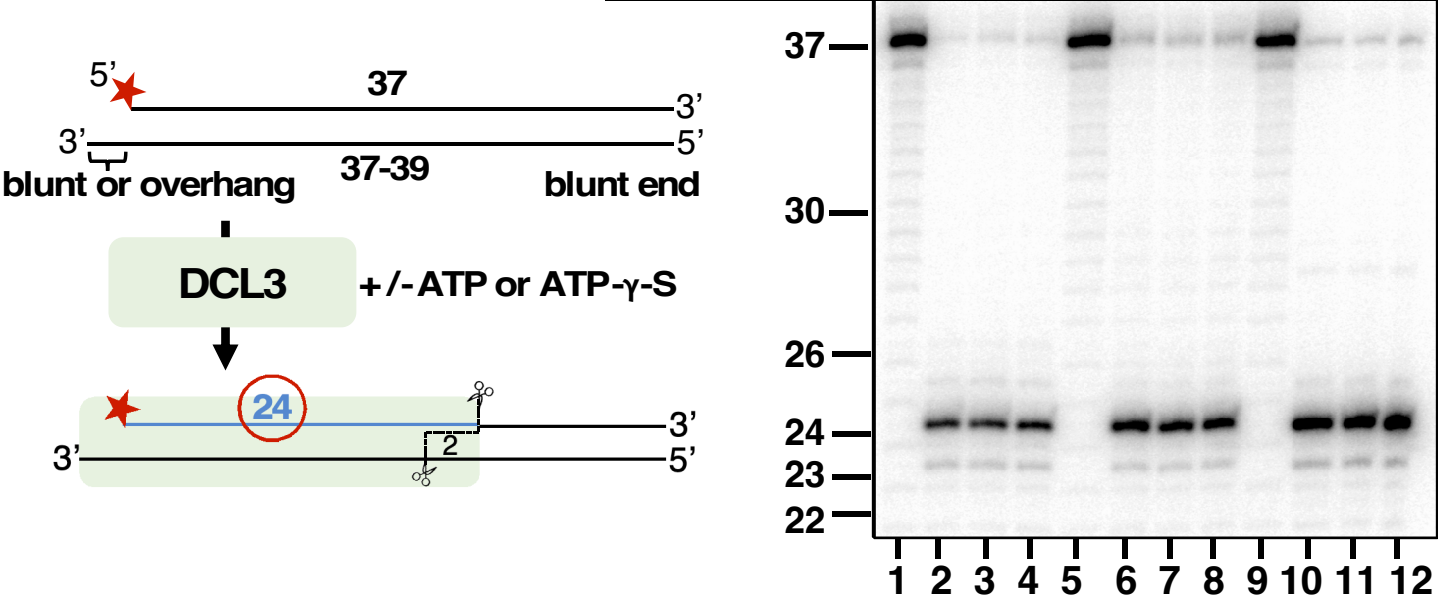

Loffer et al., Figure 5-figure supplement 1
