# Supplementary figures and images for: A DCL3 dicing code within Pol IV-RDR2 transcripts diversifies the siRNA pool guiding RNA-directed DNA methylation
Source: eLife journal article supplement (doi:10.7554/elife.73260), 2022-01-31

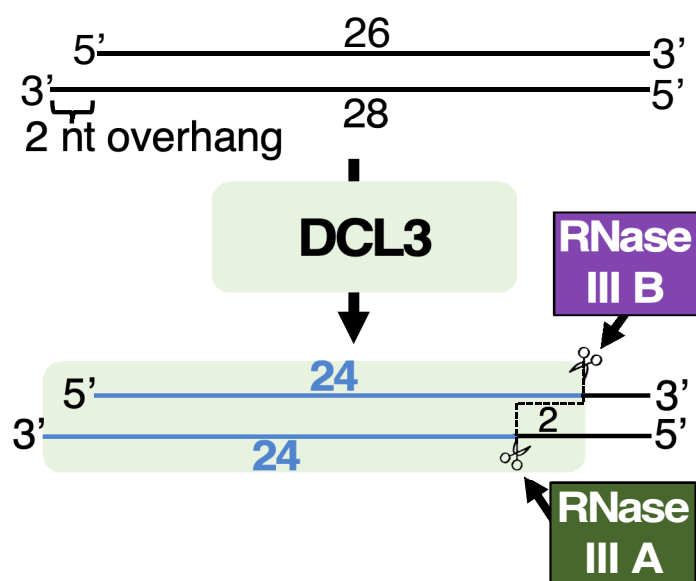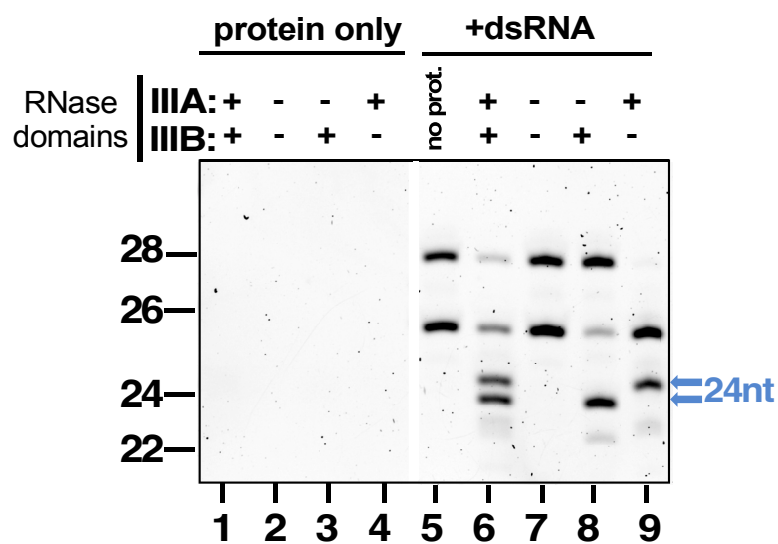

Loffer et al, Figure 3-figure supplement 1

Supplement: supp [file elife-73260-supp-v1.zip]

**A. Test of apyrase activity**

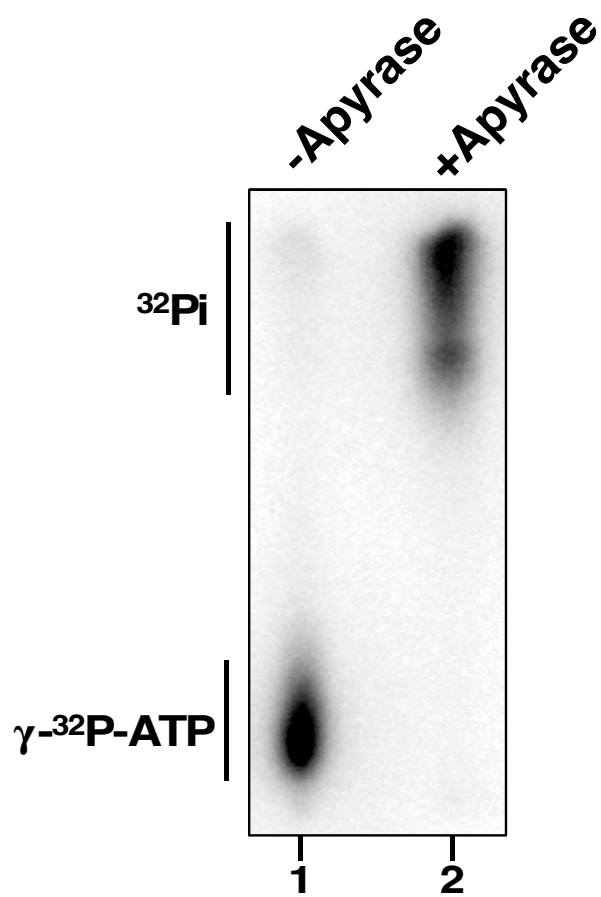

**B. PNK labeling prevented by apyrase incubation with ATP**

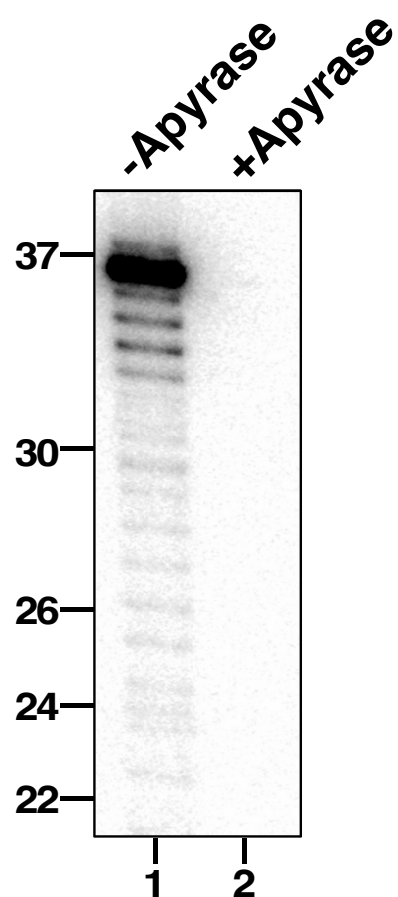

Supplement: supp [file elife-73260-supp-v1.zip]

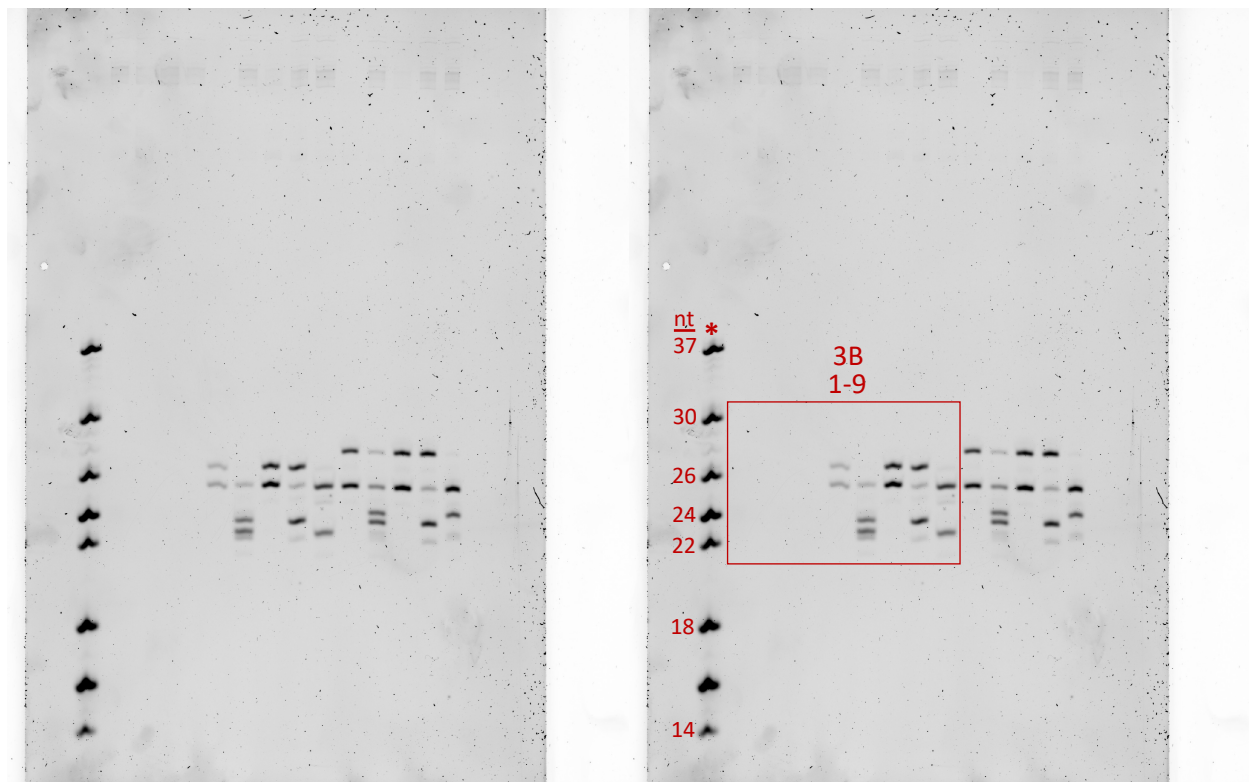

Supplement: supp [file elife-73260-supp-v1.zip › elife_poa_e73260_Figure_3_source_data_1.pdf]

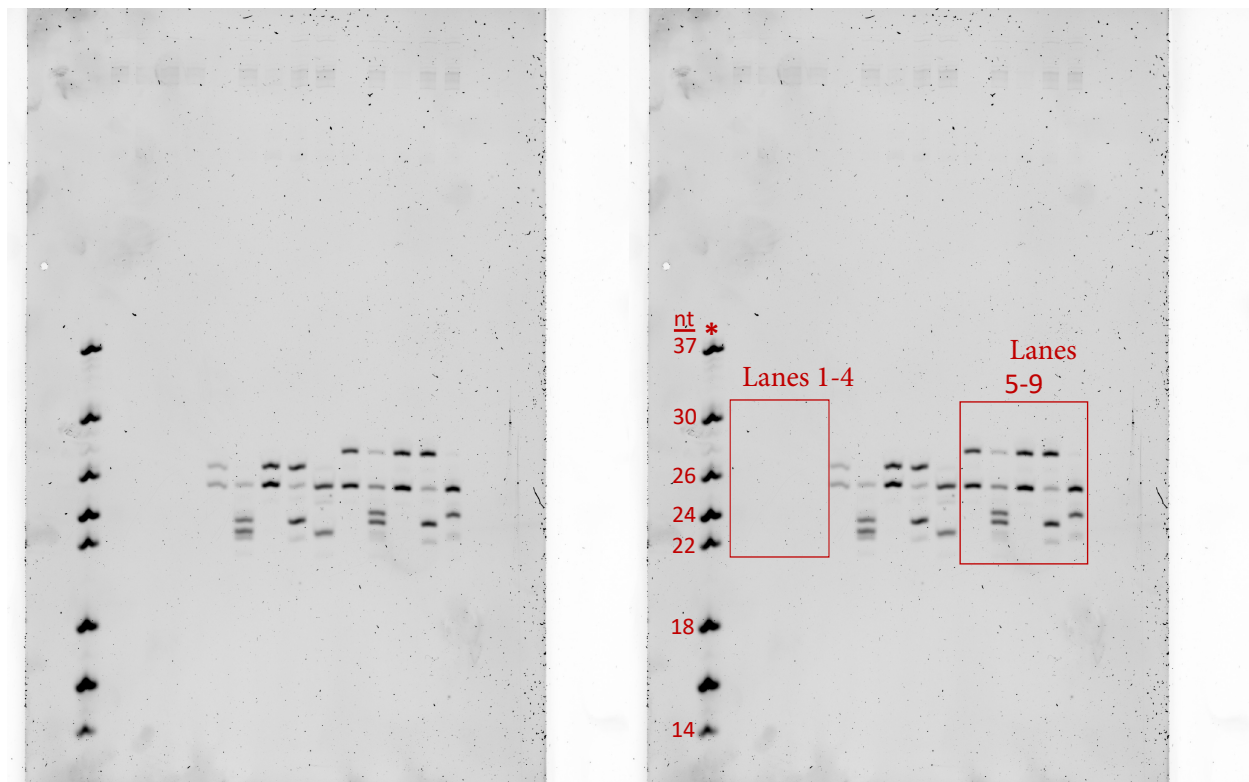

Supplement: supp [file elife-73260-supp-v1.zip › elife_poa_e73260_Figure_3_figure_supplement_1_source_data_1.pdf]

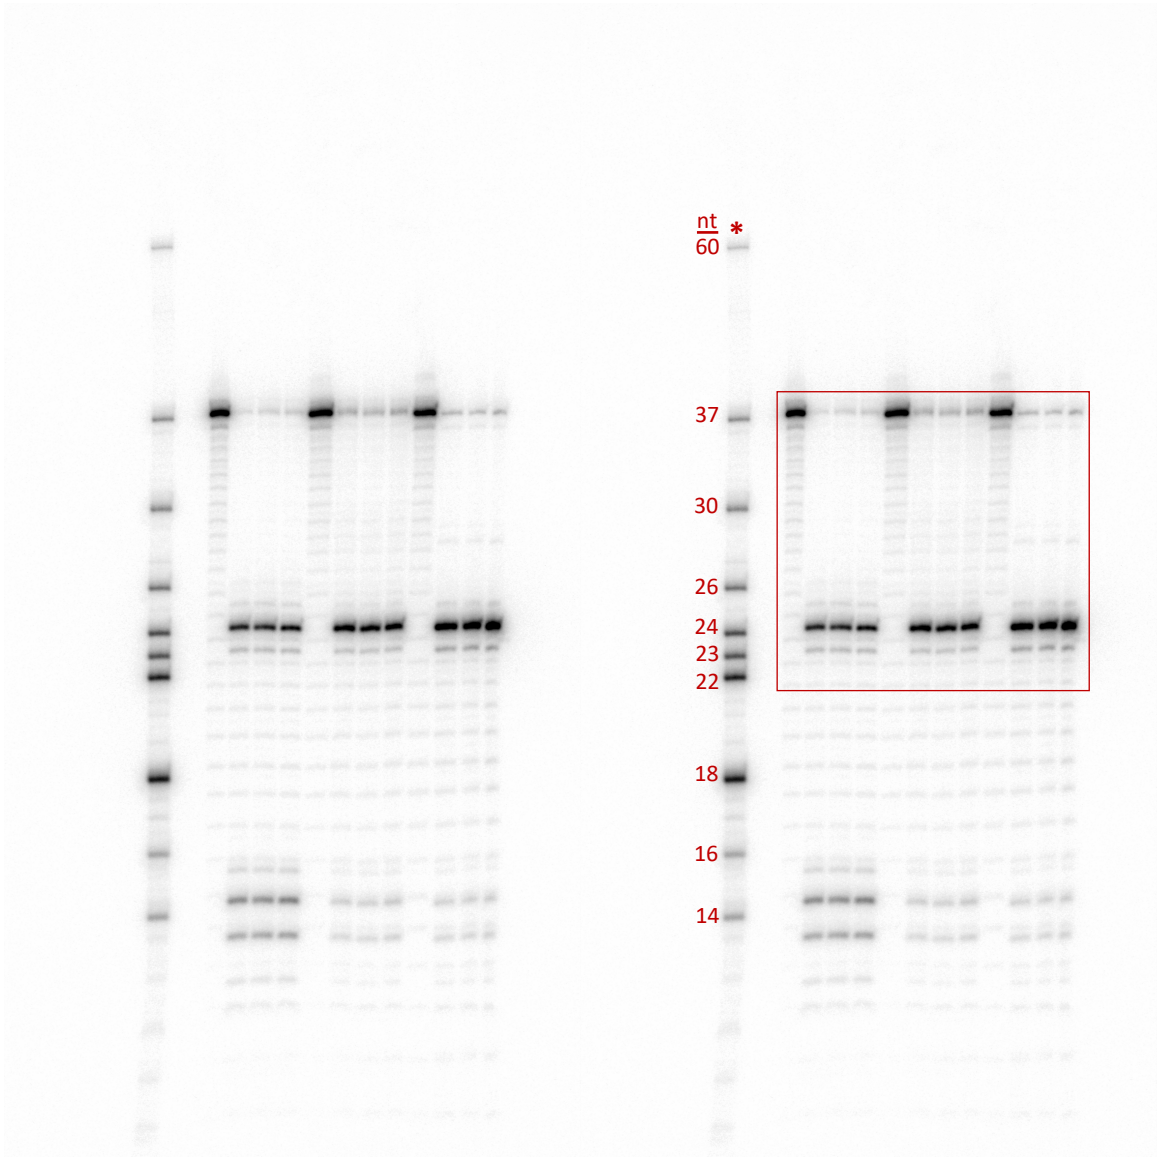

Supplement: supp [file elife-73260-supp-v1.zip › elife_poa_e73260_Figure_5_figure_supplement_1_source_data_1.pdf]

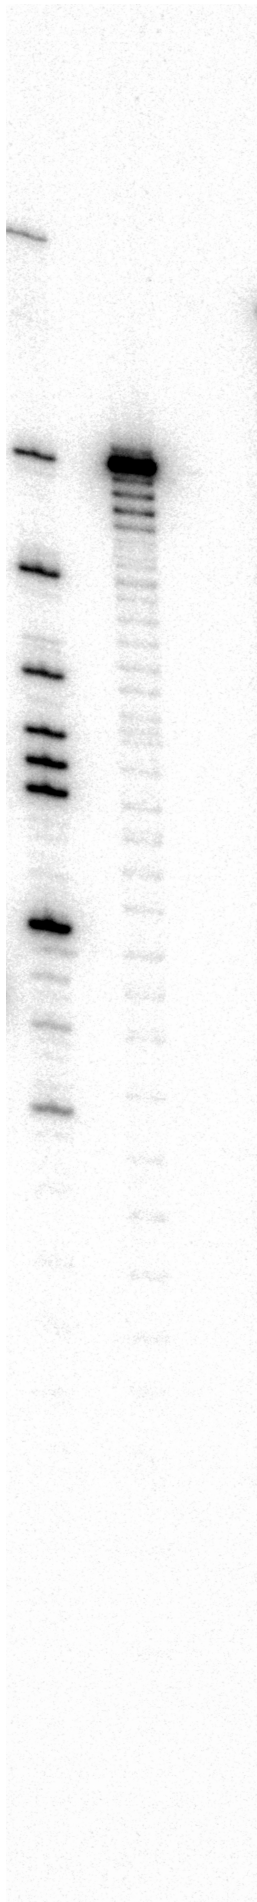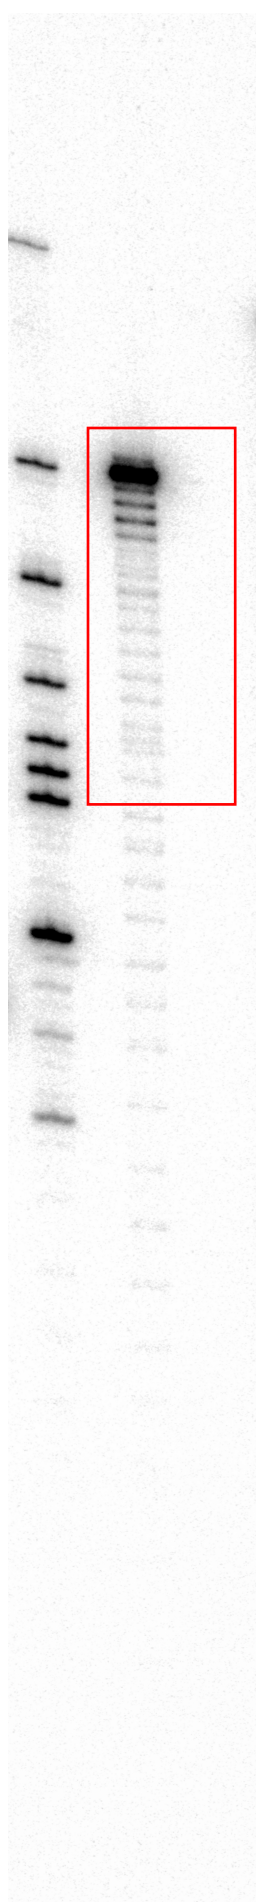

Supplement: supp [file elife-73260-supp-v1.zip]
